# Supplementary material
Source: publisher figshare collection journal article supplement (https://diabetesjournals.figshare.com/articles/dataset/_/19601518)
Supplement: Supplementary file 1 [file 1]

## Supplemental Tables and Figures

**Supplemental Table 1.** Functional Activity (EC<sub>50</sub> in cAMP Assay) of PYY and GIP peptides at their respective mouse receptors.

**Supplemental Table 2.** Summary of the mean pharmacokinetic parameters following a single subcutaneous (SC) dose of LAGIPRA or LAPYY to male CD-1 mice.

**Supplemental Figure 1:** Analog structures. Structure long-acting GIPR agonist (A, LAGIPRA), long-acting PYY analog (B, LAPYY) and short-acting GIPR agonist (C, GIPRA). Compound 4 in Osterbaard et al., WO 2016/198682 and Sequence ID Numbers 354 and 123 in Taiji et al., WO 2018/181864.

**Supplemental Figure 2.** *In vivo* characterization of GIPR and Y2R agonists in mice. Wild-type (WT) and Lean wild-type (C57BL/6J, A and E) and germline, whole-body GIPR mice (Gipr<sup>-/-</sup>, B and F) dosed subcutaneously with vehicle, a long (A, 100 nmol/kg or 300 nmol/kg) or short-acting (E, 3 nmol/kg or 30 nmol/kg) glucose-dependent insulintropic polypeptide receptor agonist 15-min (short-acting analogs) or 16-hours (long-acting agents) prior to an ipGTT, n=5 per group. Twenty-four-hour body weight and food intake in lean WT mice dose with a long-acting PYY analog (C and D). Data are presented as mean ± SEM. P<0.05\* compared to vehicle. Statistical analyses performed included one-way ANOVA, followed by Dunnett's multiple comparisons test where appropriate.

**Supplemental Figure 3:** GIPR agonism attenuates PYY-induced aversion in mice. Saccharin preference ratio, 24-hour body weight and food intake in lean C57/Bl6 mice dosed subcutaneously (SC) with a long-acting peptide tyrosine-tyrosine analog (LAPYY) alone (A, C and E) or in combination (B, E and F) with a long-acting glucose-dependent

insulinotropic polypeptide receptor agonist (LAGIPRA), n=6 per group. Values are presented as mean  $\pm$  SEM. \*P<0.05 vs vehicle. \$P<0.05 vs PYY only group. Statistical analyses performed included student unpaired t-test or one-way ANOVA, followed by Dunnett's multiple comparisons test where appropriate.

**Supplemental Figure 4.** GIPR agonism induced cFos expression in Npy2r+ neurons in the area postrema. Mice were subcutaneously injected with vehicle (A), LAPYY (B, 100 nmol/kg), GIPRA (C, 10nmol/kg) or combination (D, GIPRA (10 nmol/kg) + LAPYY 100 nmol/kg). Mouse brains were collected 45 minutes post injection. N=6 per group. RNA triple in situ was conducted on area postrema using probes against *cFos* (green), *Gipr* (purple) and *Npy2r* (white). Arrows in panels C and D points to Y2R+ cells expressing cFos. (E) Quantification of Y2R+ neurons that also express cFos. Scale bars: 20um. Values are presented as mean  $\pm$  SEM. Statistical analyses used one-way ANOVA followed by Dunnett's multiple comparison test \*p<0.05, \*\*\*\*p<0.0001.

**Supplemental Figure 5.** cFos cell count in other brain regions. Values are presented as mean  $\pm$  SEM. Statistical analyses performed included one-way ANOVA followed by Dunnett's multiple comparison test. A) DMX: dorsal motor complex. B) ARC: arcuate nucleus of the hypothalamus. C) DHM: dorsal medial hypothalamus. D) VMH: ventral medial hypothalamus. E) PVH: paraventricular hypothalamus. F) ACB: nucleus accumbens. G) VTA: ventral tegmental area.

**Supplemental Figure 6.** cFos expression in PBN<sub>D</sub> neurons induced by PYY. Mice were subcutaneously injected with vehicle, LAPYY (100nmol/kg), GIPRA (10nmol/kg) or combination (GIPRA (10 nmol/kg) + LAPYY (100 nmol/kg)). Mouse brains were collected

120 minutes post injection. Immunohistochemistry was conducted on parabrachial nucleus using antibodies against cFos (green), CGRP (purple) and FoxP2 (red). Note that many cFos+ cells in PYY injected mice are present in dorsal PBN<sub>D</sub> and do not express FoxP2 or CGRP (arrowheads). Scale bars: 50um.
