# Supplementary material
Source: publisher figshare collection journal article supplement (https://diabetesjournals.figshare.com/articles/dataset/_/19601518)

A: Long-acting GIPR agonist (LAGIPRA)

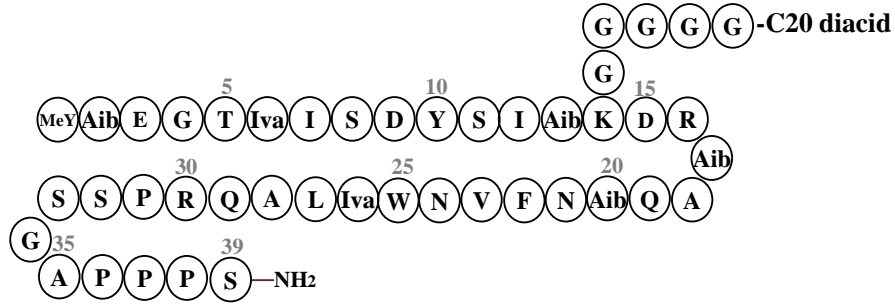

B: Long-acting PYY analog (LAPYY)

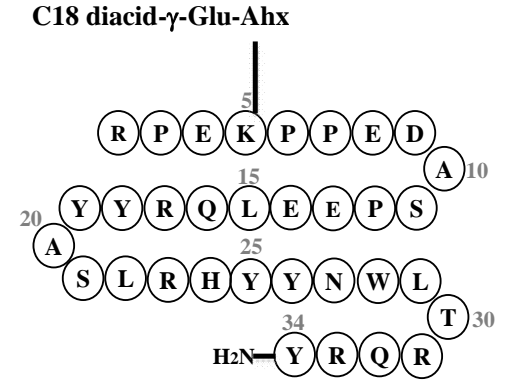

C: Short-acting GIPR agonist (GIPRA)

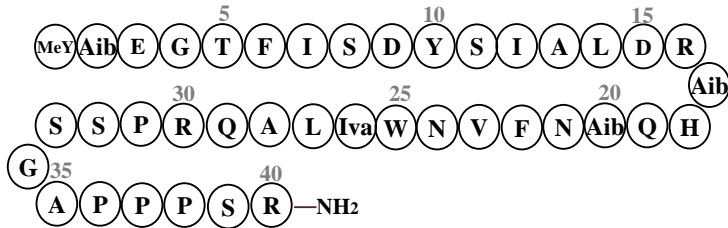

Supplement: Supplementary file 2 [file 1]
