# Supplementary material
Source: publisher figshare collection journal article supplement (https://diabetesjournals.figshare.com/articles/dataset/_/19601518)

Vehicle

A

LAPYY

B

GIPRA

C

GIPRA+LAPYY

D

cFos/Gipr/Npy2

E

- Vehicle
- GIPRA (10nmol/kg)
- LAPYY (100nmol/kg)
- LAPYY + GIPRA

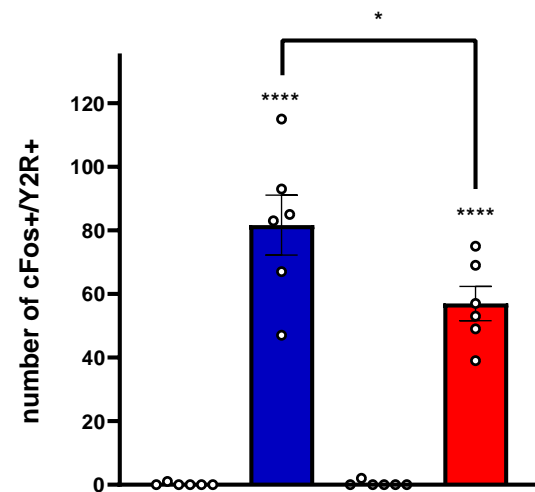

Supplement: Supplementary file 6 [file 1]
