# Supplementary material
Source: publisher figshare collection journal article supplement (https://diabetesjournals.figshare.com/articles/dataset/_/19601518)
Supplement: Supplementary file 8 [file 1]

**Supplemental Table 1: Functional Activity of PYY and GIP peptides at their respective mouse receptors.**

|                                                                                                                                                                                                                                                                                                                                        | Mouse Npy2r        | Mouse Gipr         | Mouse Glp1r        |
|----------------------------------------------------------------------------------------------------------------------------------------------------------------------------------------------------------------------------------------------------------------------------------------------------------------------------------------|--------------------|--------------------|--------------------|
| Coumpound                                                                                                                                                                                                                                                                                                                              | EC50 pMPm (SEM), n | EC50 pMPm (SEM), n | EC50 pMPm (SEM), n |
| LAPYY (Cpd 4)                                                                                                                                                                                                                                                                                                                          | 3.9, (2.1), 2      | ND                 | ND                 |
| PYY 1-36                                                                                                                                                                                                                                                                                                                               | 3.8, (1.7), 2      | ND                 | ND                 |
| LAGIPRA (Seq ID No 354)                                                                                                                                                                                                                                                                                                                | ND                 | 0.026 (0.015) 3    | >5000 (na), 3      |
| GIPRA (Seq ID No 123)                                                                                                                                                                                                                                                                                                                  | ND                 | 0.0058 (0.002), 2  | >5000 (na), 2      |
| D-Ala2-GIP                                                                                                                                                                                                                                                                                                                             | ND                 | 0.062 (0.007), 5   | 2530 (1070) 4      |
| EC <sub>50</sub> values shown are the geometric means and the standard error of the mean (SEM) and the number of independent experiments (n), ND, not determined. Compound 4 and Sequence ID Numbers 354 and 123 refer to the respective identification numbers in Osterbaard et al., WO 2-16/198682 and Taiji et al., WO 2018/181864. |                    |                    |                    |

**Supplemental Table 2. Summary of the mean pharmacokinetic parameters following a single subcutaneous (SC) dose of LAGIPRA or LAPYY to male CD-1 mice.**

|                                                                                                                                                                                                                               | LAGIPRA | LAPYY |
|-------------------------------------------------------------------------------------------------------------------------------------------------------------------------------------------------------------------------------|---------|-------|
| Dose (nmol/kg)                                                                                                                                                                                                                | 200     | 200   |
| C <sub>max</sub> (nmol/L)                                                                                                                                                                                                     | 959     | 1360  |
| T <sub>max</sub> (h)                                                                                                                                                                                                          | 6.0     | 6.0   |
| AUC <sub>INF</sub> (h*nmol/L)                                                                                                                                                                                                 | 41147   | 44259 |
| CL/F (mL/h/kg)                                                                                                                                                                                                                | 4.83    | 4.52  |
| T <sub>1/2</sub> (h)                                                                                                                                                                                                          | 21.3    | 20.7  |
| AUC <sub>INF</sub> : Area under the curve from 0 to infinity; CL/F: apparent clearance; C <sub>max</sub> = maximal concentration; T <sub>max</sub> = time at maximal concentration; T <sub>1/2</sub> = elimination half-life. |         |       |
