# Supplementary material
Source: publisher figshare collection journal article supplement (https://diabetesjournals.figshare.com/articles/dataset/_/19601518)

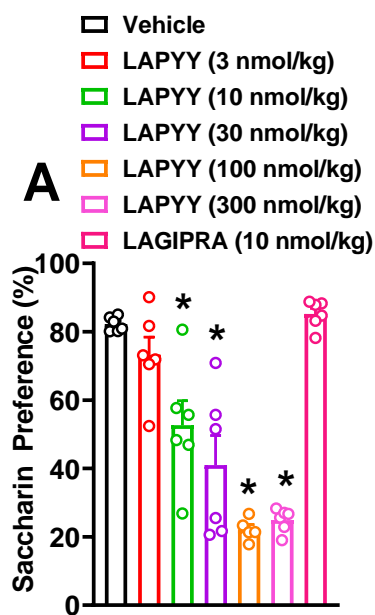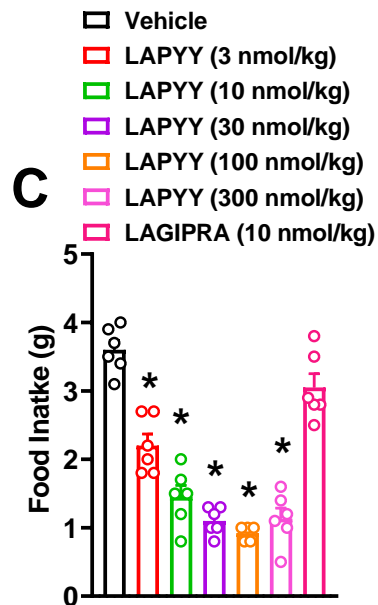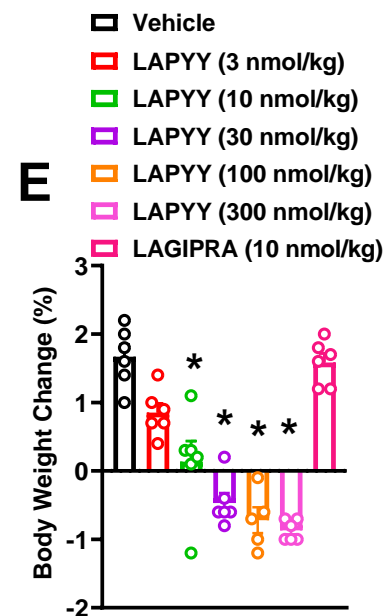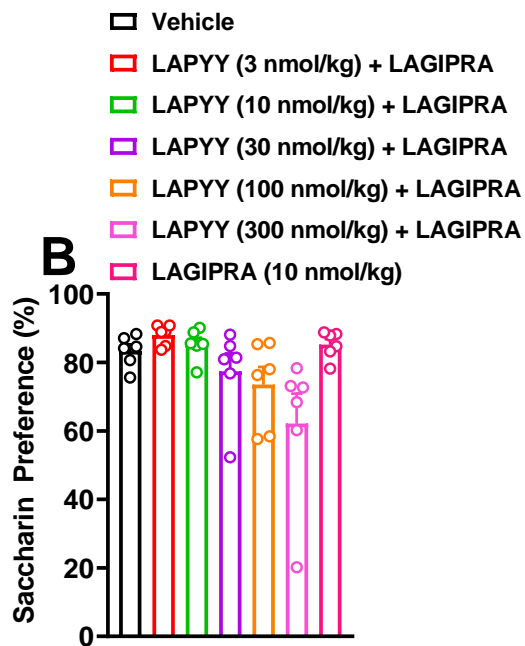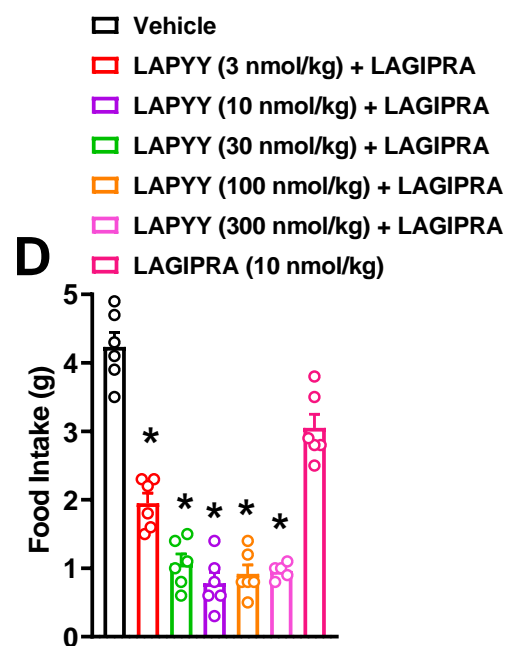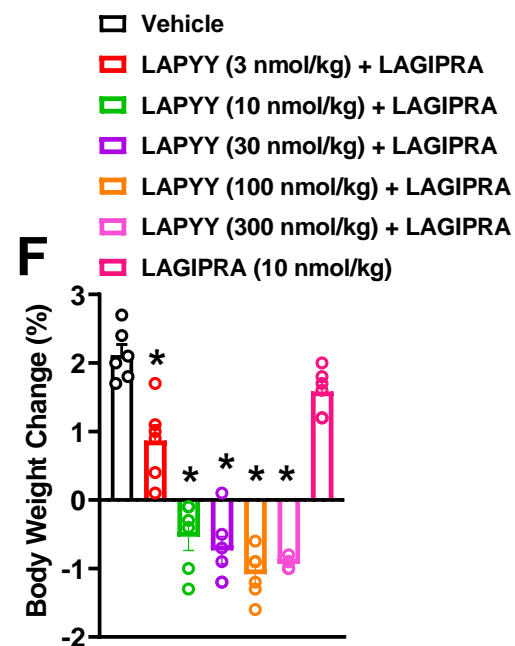

Supplement: Supplementary file 3 [file 1]

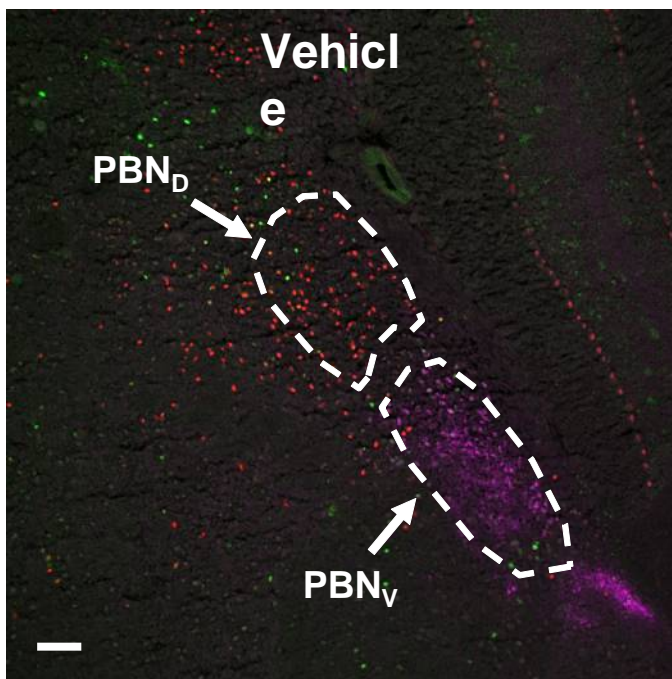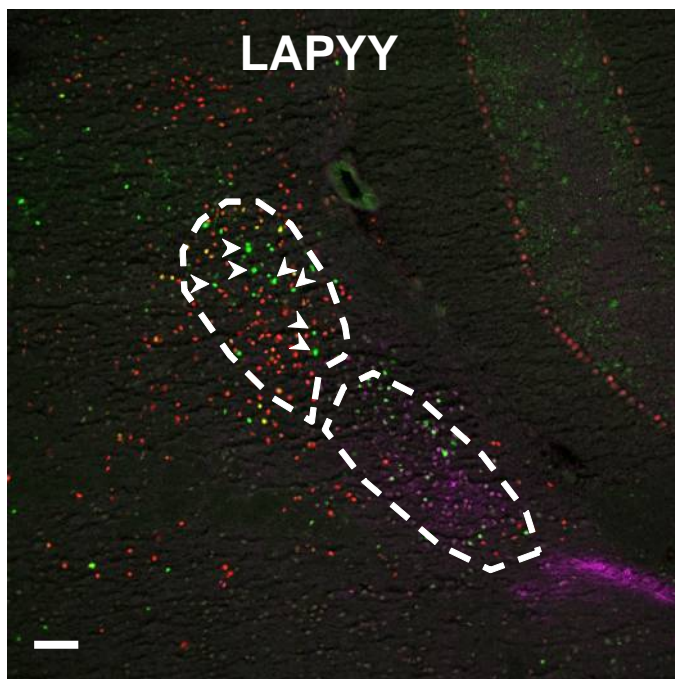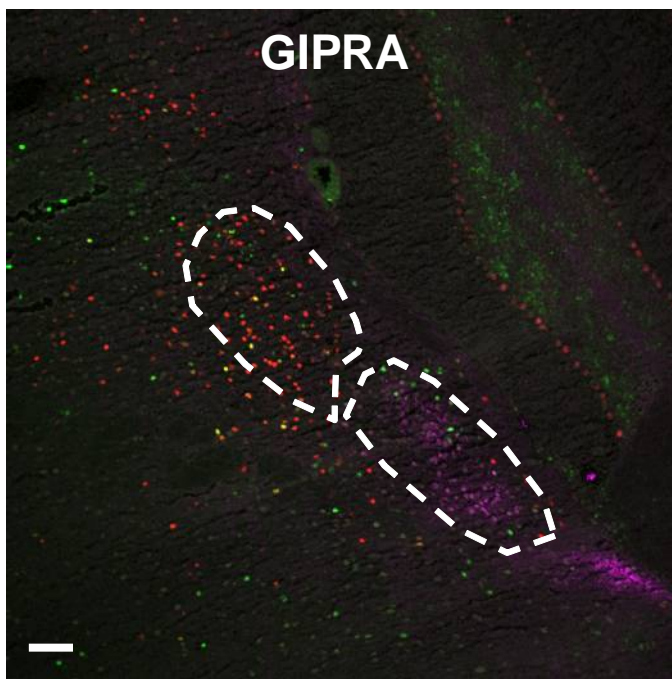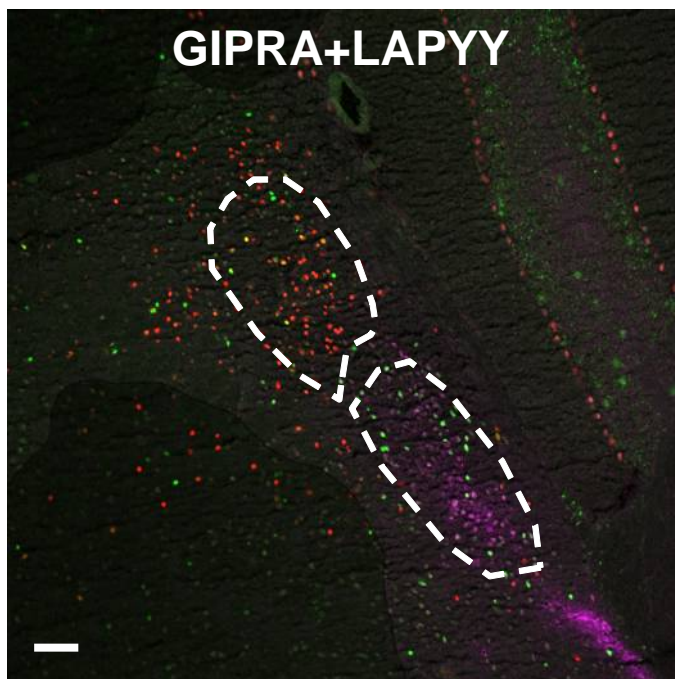

**cFos/CGRP/FoxP2**

Supplement: Supplementary file 4 [file 1]

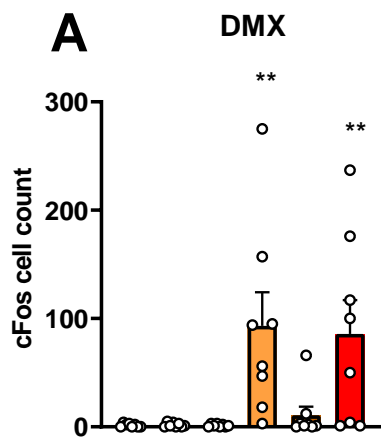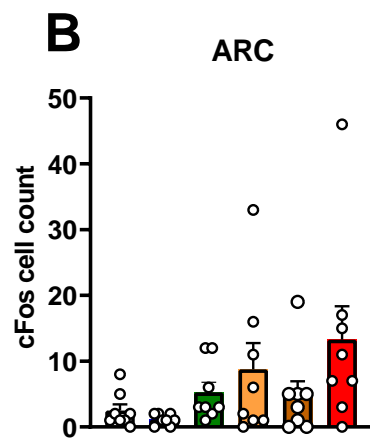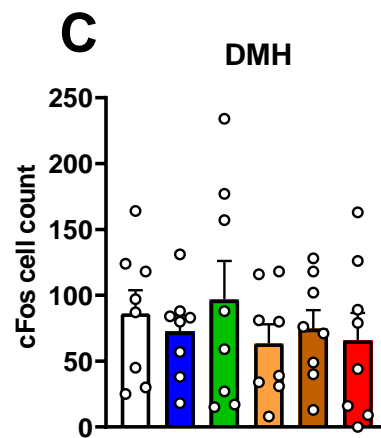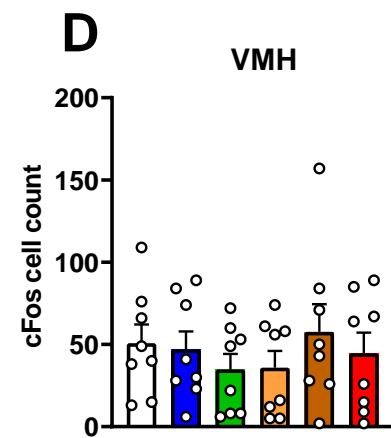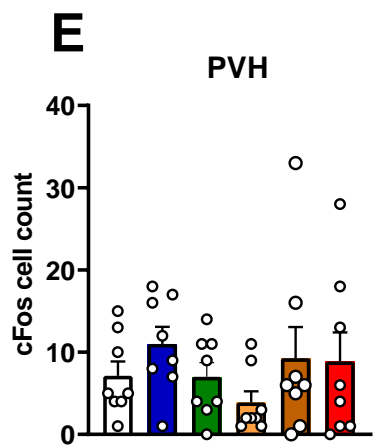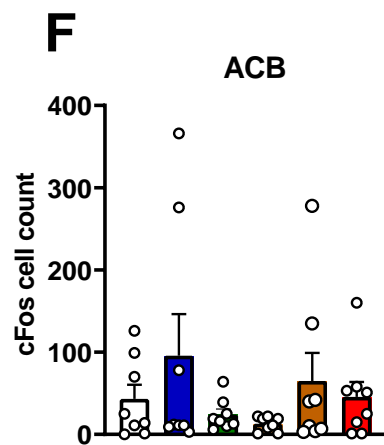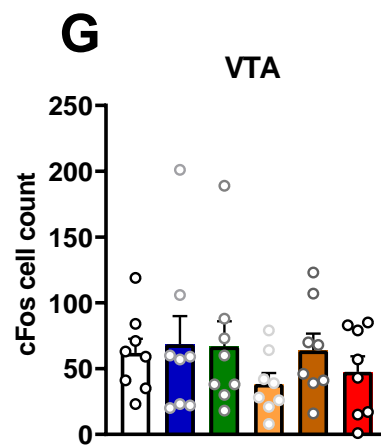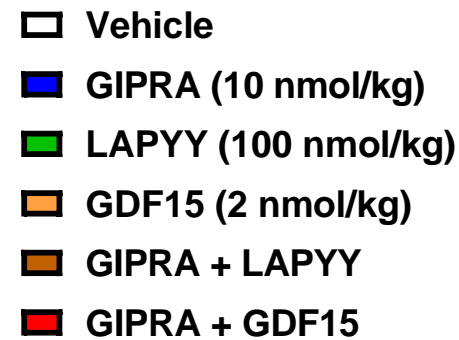

Supplement: Supplementary file 5 [file 1]

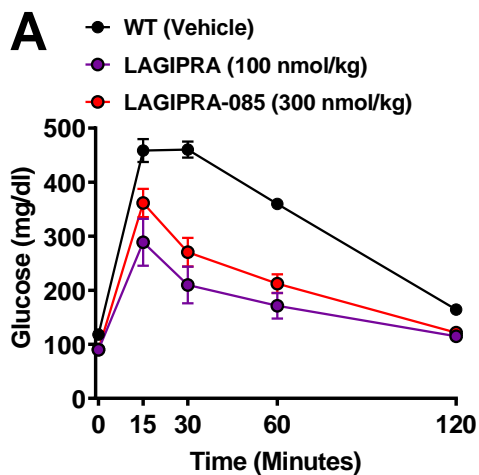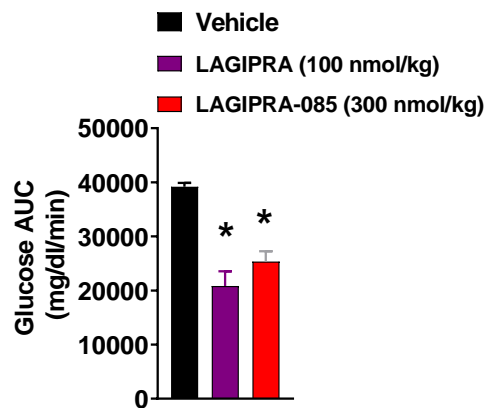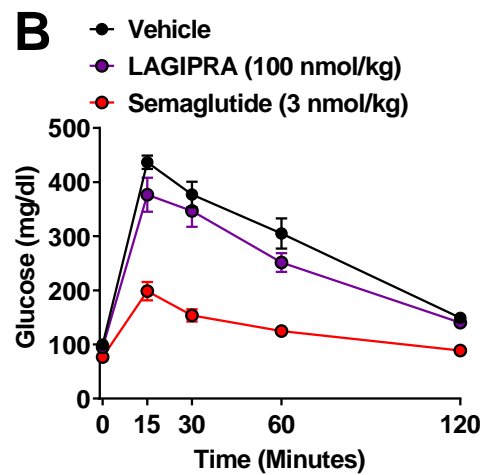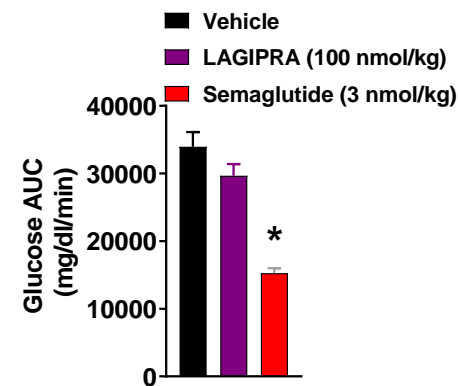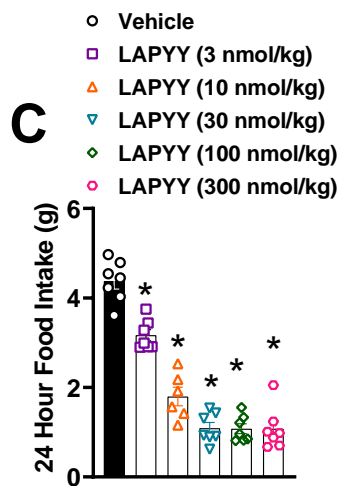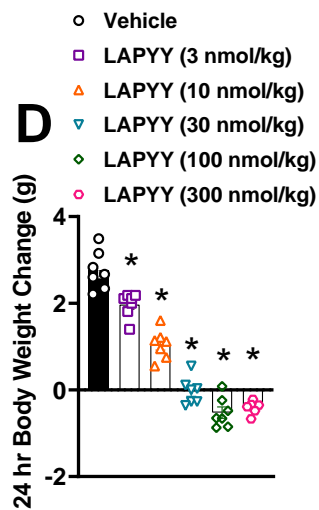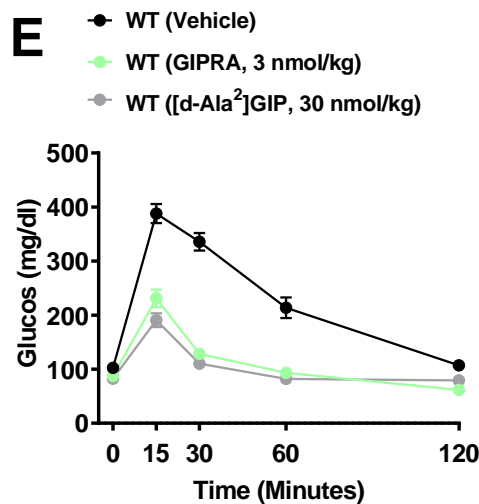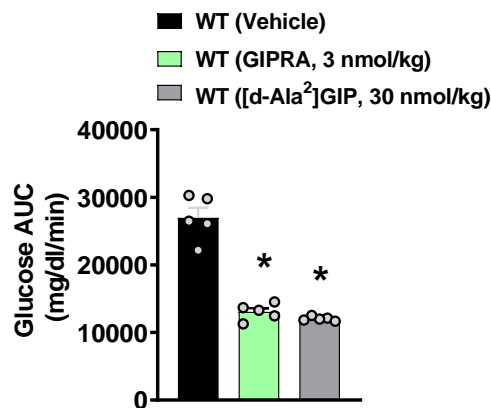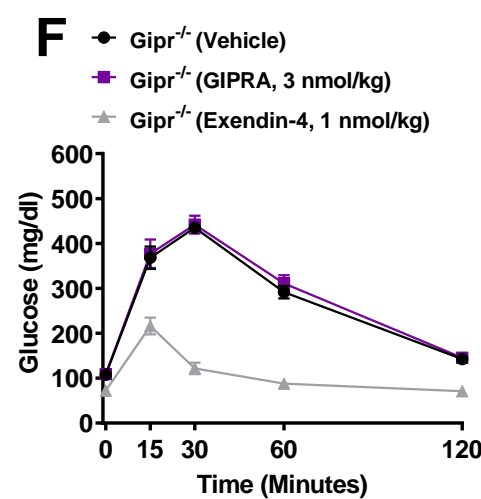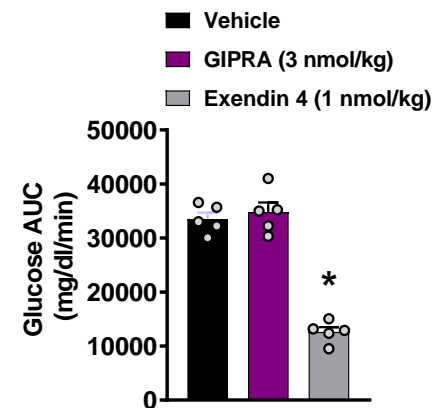

Supplement: Supplementary file 7 [file 1]
